# Supplementary material for: Stiff chains inhibit and flexible chains promote protein adsorption to polyelectrolyte multilayers
Source: Royal Society of Chemistry journal article supplement (doi:10.1039/c4sm00413b), 2014-01-01
Supplement: c4sm00413b1.pdf [file c4sm00413b1.pdf]

## Electronic Supplementary Information

### Stiff Chains Inhibit and Flexible Chains Promote Protein Adsorption to Polyelectrolyte Multilayers

Bo Wu,<sup>ab</sup> Guangming Liu,<sup>\*a</sup> Guangzhao Zhang<sup>c</sup> and Vincent S. J. Craig<sup>\*b</sup>

<sup>a</sup>Hefei National Laboratory for Physical Sciences at the Microscale, Department of Chemical Physics, University of Science and Technology of China, Hefei, 230026, P. R. China.

<sup>b</sup>Department of Applied Mathematics, Research School of Physics and Engineering, The Australian National University, Canberra, ACT 0200, Australia.

<sup>c</sup>Faculty of Materials Science and Engineering, South China University of Technology, Guangzhou, 510640, P. R. China.

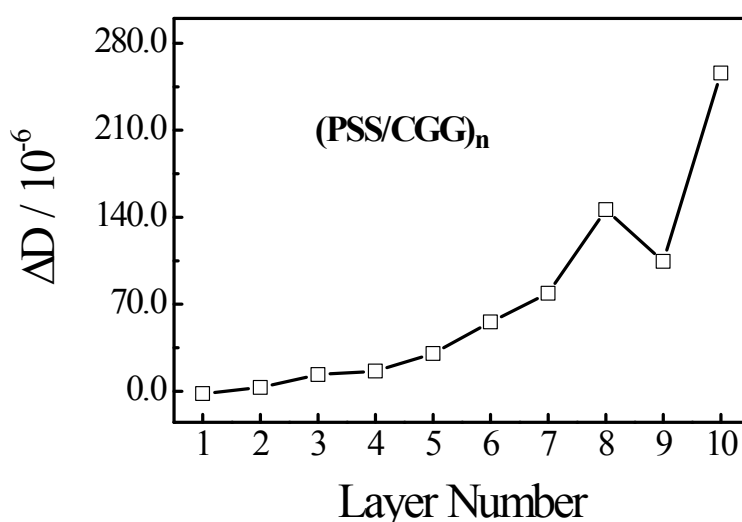

**Figure S1.** The layer number dependence of shift in dissipation ( $\Delta D$ ) for the growth of PSS/CGG multilayer in a 0.1 M NaCl solution. Here, the odd and even layer numbers correspond to the deposition of PSS and CGG, respectively.

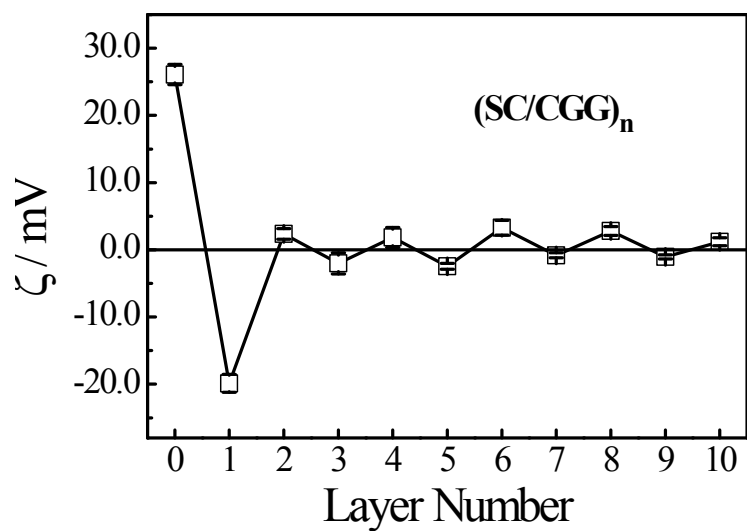

**Figure S2.** The layer number dependence of change in surface Zeta potential ( $\zeta$ ) for the growth of SC/CGG multilayer in a 0.1 M NaCl solution. Here, the odd and even layer numbers correspond to the deposition of SC and CGG, respectively.

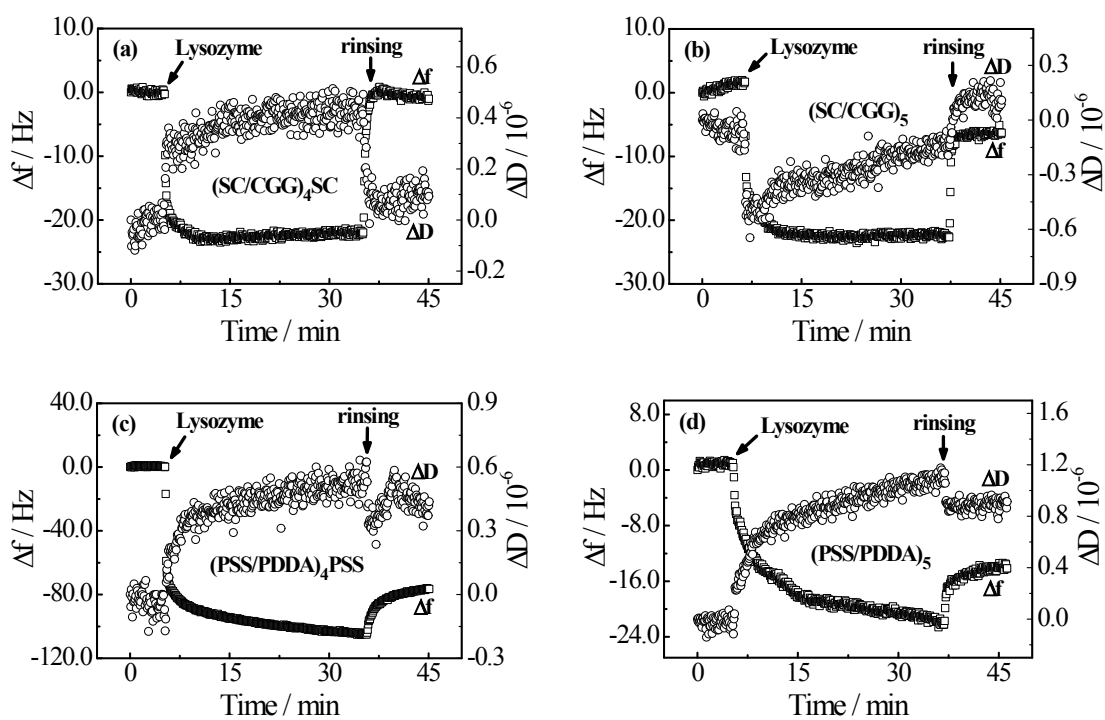

**Figure S3.** Changes in frequency ( $\Delta f$ ) and dissipation ( $\Delta D$ ) as a function of time for the adsorption of lysozyme on the SC/CGG and PSS/PDDA multilayer surfaces, respectively, where the overtone number ( $n$ ) is 3. For  $(SC/CGG)_4SC$ , panel (a);  $(SC/CGG)_5$ , panel (b);  $(PSS/PDDA)_4PSS$ , panel (c) and  $(PSS/PDDA)_5$ , panel (d); PEMs.
